# Supplementary material for: Investigations of dynamic amyloid-like structures of the Wnt signalling pathway by solid-state NMR
Source: Royal Society of Chemistry journal article supplement (doi:10.1039/c8cc01346b), 2018-01-01
Supplement: c8cc01346b1.pdf [file c8cc01346b1.pdf]

## SUPPORTING INFORMATION

for

### **Investigations of dynamic amyloid-like structures of the Wnt signalling pathway by solid-state NMR**

M. E. Ward<sup>a</sup>, M. A. Daniëls<sup>a</sup>, E. C. van Kappel<sup>b</sup>, M. M. Maurice<sup>b</sup>, M. Baldus<sup>a</sup>

<sup>a</sup> Bijvoet Center for Biomolecular Research, Universiteit Utrecht, Padualaan 8, Utrecht, The Netherlands

<sup>b</sup> Oncode Institute, Center for Molecular Medicine, Cell Biology, University Medical Center Utrecht, Heidelberglaan 100, Utrecht, The Netherlands

## Materials and methods

**Expression and purification of the Axin DIX domain.** The human Axin 1a DIX domain (residues 778-862) was cloned into a PET24 expression vector. Axin-DIX proteins were expressed in *E. coli* Rosetta2 cells. For isotopically labelled samples, M9 medium was supplemented with  $^{13}\text{C}$  glucose and  $^{15}\text{NH}_4\text{Cl}$ . Protein expression was induced in 1-l bacterial cultures at an  $\text{OD}_{600}$  of  $\sim 0.6$  with the addition of IPTG to a final concentration of 0.5 mM. Protein expression continued at 18 °C for  $\sim 20$  h. Bacterial pellets were resuspended in 50 mM  $\text{NaH}_2\text{PO}_4$  (pH = 8), 1 M NaCl, 10 mM imidazole, 1 mM  $\beta$ -mercaptoethanol and 20 mg/L lysozyme and were subsequently lysed by sonication. Lysates were cleared by centrifugation (30 min, 4 °C, 25 000 g) and filtration (0.45  $\mu\text{m}$ ). Proteins were purified by nickel-affinity chromatography (Quiagen) using a batch procedure. Following elution, proteins were concentrated using an Amicon Ultra-15 10 K centrifugal filter. At high concentrations, the Axin-DIX domain self-associates and can be pelleted through ultracentrifugation and packed into a solid-state NMR MAS rotor.

**Two phase system.** Organic molecule extraction from the purified Axin-DIX domain was performed as has been described previously<sup>1</sup>. To begin, 320  $\mu\text{l}$  of ice-cold MeOH (containing 50  $\mu\text{g}/\text{ml}$  of BHT) was added to approximately 0.25 mg of protein, followed by the addition of 640  $\mu\text{l}$  of ice-cold  $\text{CHCl}_3$ . This mixture was then incubated on ice for 20 min with occasional vortexing before high purity water (300  $\mu\text{l}$ ) was added. The sample was then incubated on ice for an additional 10 min with occasional mixing. Next, the sample was centrifuged for 5 min at 2 000 g and the upper aqueous phase was removed and re-extracted by addition of 500  $\mu\text{l}$  of ice-cold  $\text{CHCl}_3$ :MeOH (2:1, v/v) as above. The upper phase was discarded and both organic phases were combined and dried under nitrogen gas. The dried phase was then resuspended in 200  $\mu\text{l}$   $\text{CDCl}_3$ .

**Magic angle spinning solid-state NMR spectroscopy.** All experiments were collected on Avance III spectrometers (Bruker Biospin, Billerica, MA) operating at either 700.13 MHz or 950.20 MHz using 3.2 mm triple resonance MAS probes at a sample temperature of  $\sim 5$  °C. For both spectrometers typical  $\pi/2$  pulses were 2.5-3  $\mu\text{s}$  for  $^1\text{H}$ , 5  $\mu\text{s}$  for  $^{13}\text{C}$ , and 7  $\mu\text{s}$  for  $^{15}\text{N}$ .

Resonance assignments were obtained using a minimal set of three 3D experiments. CANCO, NCACX, and NCOCX experiments were collected on a narrow-bore Bruker Avance 700 MHz spectrometer with MAS at 13 kHz. The  $^1\text{H}/\text{X}$  (where X is  $^{15}\text{N}$  or  $^{13}\text{C}$ ) cross-polarization (CP)<sup>2</sup> contact times were 0.8-1 ms, with a constant radio frequency (rf) field of 35 and 50 kHz on nitrogen and carbon, respectively, while the proton lock field was ramped linearly around the  $n = 1$  Hartmann/Hahn condition<sup>3</sup>.  $^{15}\text{N}/^{13}\text{C}$  and  $^{15}\text{N}/^{13}\text{CO}$  band-selective transfers<sup>4</sup> were implemented with a contact time of 4-5 ms. For the  $^{13}\text{CA}/^{15}\text{N}$  CP, a constant lock field of  $2.5 \times \nu_r$  ( $\nu_r = \omega_r/2\pi$ , spinning frequency) strength was applied on  $^{15}\text{N}$ , while the  $^{13}\text{C}$  field was ramped linearly (10% ramp) around  $1.5 \times \nu_r$ . For the  $^{13}\text{CO}/^{15}\text{N}$  transfer, a constant lock field of  $3.5 \times \nu_r$  field strength was applied on  $^{13}\text{C}$ , while the  $^{15}\text{N}$  field was ramped linearly (10% ramp) around  $2.5 \times \nu_r$ . Continuous wave proton decoupling at 83 kHz was used during  $^{15}\text{N}/^{13}\text{C}$  CP. SPINAL64<sup>5</sup> decoupling optimized around 83 kHz was used during  $^{15}\text{N}$  and  $^{13}\text{C}$  direct and indirect chemical shift evolutions. For homonuclear  $^{13}\text{C}$ - $^{13}\text{C}$  mixing, PARIS<sup>6,7</sup> mixing of 30 and 50 ms for the NCACX and NCOCX experiments, respectively, were used.

2D  $^{13}\text{C}$ - $^{13}\text{C}$  experiments were collected on a narrow-bore Bruker Avance 950 MHz spectrometer equipped with a 3.2 mm triple-resonance E-Free MAS probe. To confirm and extend the assignments obtained using three dimensional spectroscopy, two dimensional  $^{13}\text{C}$ - $^{13}\text{C}$  spin diffusion experiments were obtained with MAS at 14.8 kHz<sup>8</sup>. In order to obtain distance restraints, a CHHC experiment with H-H mixing of 250  $\mu\text{s}$  was obtained, as well as additional  $^{13}\text{C}$ - $^{13}\text{C}$  experiments performed with MAS of 14 kHz and long mixing times with low-powered PARIS mixing (1 s). 2D  $^{13}\text{C}$ - $^{13}\text{C}$  INEPT-TOBSY<sup>9</sup> experiments were performed with a TOBSY mixing time of  $\sim 9$  ms using the  $\text{P}9^1_6$  mixing sequence.

For all experiments, the carbon chemical shifts were indirectly referenced to 2,2-dimethyl-2-silapentane-5-sulfonic acid (DSS) by adjusting the position of the  $^{13}\text{C}$  adamantane downfield peak to 40.48 ppm<sup>10</sup>. Data processing was performed using the software NMRPIPE<sup>11</sup> or Topspin 3.5 (Bruker, Karlsruhe, Germany). Noise analysis, peak picking, and assignments were performed in the CARAM<sup>12</sup> environment.

Sets of sequential  $^{13}\text{C}$ - $^{13}\text{C}$  peaks were generated using FANDAS<sup>13</sup> and sets of peaks representing atoms which were close in space were generated using a homemade script. Inter-residue  $^{13}\text{C}$ - $^{13}\text{C}$  peaks in the SD and PARIS spectra were assigned based off comparison to these sets.

**Solution NMR.** Reference  $^1\text{H}$ - $^{13}\text{C}$  HSQC NMR spectra performed on DOPE were recorded at on an Avance 600 Bruker NMR spectrometer equipped with a cryogenic triple-resonance gradient probe. Spectra were recorded with spectral widths of 12/100 ppm, centered at 4.7/40 ppm, with 1,024/300 points in  $^1\text{H}/^{13}\text{C}$ , respectively.  $^1\text{H}$ - $^{13}\text{C}$  HSQC NMR spectra performed on the organic phase of Axin-Dix samples were recorded on an Avance 900 Bruker NMR spectrometer equipped with a triple resonance probe. Spectra were recorded with spectral widths of 20/105 ppm, centered at 4.7/50 ppm, with 1,024/128 points in  $^1\text{H}/^{13}\text{C}$ , respectively. All spectra were recorded with a recycle delay of 1.0 s.

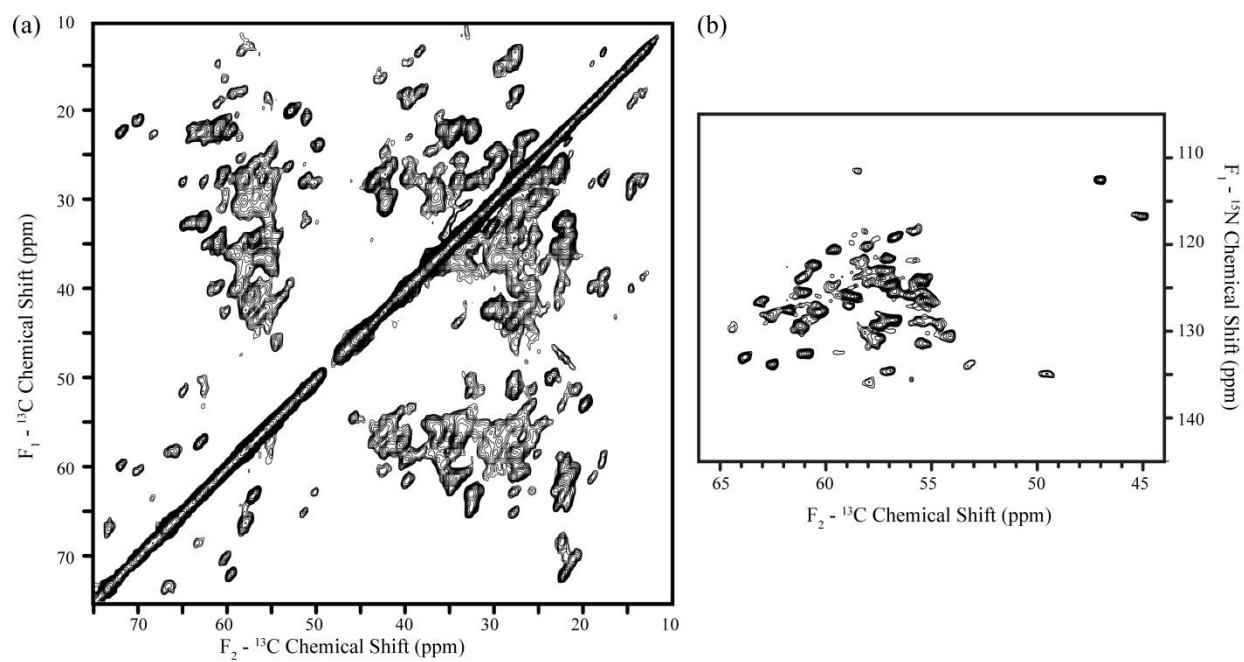

**Fig. S1** (a)  $^{13}\text{C}$ - $^{13}\text{C}$  PARIS (mixing time 30 ms) and (b)  $^{15}\text{N}$ - $^{13}\text{C}$  spectra recorded on the isolated Axin-DIX domain

**Table S1** Non-sequential peaks observed in 2D  $^{13}\text{C}$ - $^{13}\text{C}$  and HCCH experiments on the Axin-DIX domain.

| Atom 1                               |     |      | Atom 2 |     |      |
|--------------------------------------|-----|------|--------|-----|------|
| 2D $^{13}\text{C}$ - $^{13}\text{C}$ |     |      |        |     |      |
| 131.9                                | CG  | F850 | 30.2   | CD  | K825 |
| 63.4                                 | CA  | V784 | 59.0   | CA  | I855 |
| 15.8                                 | CD1 | I783 | 14.2   | CD1 | I854 |
| 32.1                                 | CB  | V784 | 24.4   | CG  | K853 |
| 55.1                                 | CA  | Y788 | 17.5   | CG2 | I855 |
| 56.7                                 | CA  | E839 | 49.6   | CD  | P848 |
| 50.9                                 | CA  | A804 | 39.3   | CB  | I854 |
| 60.9                                 | CA  | V805 | 52.7   | CA  | L847 |
| 34.7                                 | CB  | V805 | 25.5   | CG  | L847 |
| 61.0                                 | CA  | V805 | 25.7   | CG  | L847 |
| 60.8                                 | CA  | I854 | 43.6   | CB  | F824 |
| 69.3                                 | CB  | T798 | 41.5   | CB  | L813 |
| 22.3                                 | CG1 | V840 | 19.4   | CB  | A845 |
| 44.7                                 | CA  | G856 | 33.1   | CB  | K825 |
| 41.8                                 | CB  | K825 | 17.5   | CG2 | I855 |
| 60.7                                 | CA  | I854 | 25.7   | CG  | L847 |
| 59.3                                 | CA  | V835 | 32.0   | CB  | V827 |
| 44.6                                 | CA  | G856 | 22.0   | CD1 | L847 |
| 44.9                                 | CA  | G856 | 25.7   | CG  | L847 |
| 59.3                                 | CA  | V835 | 23.7   | CG  | K826 |
| 69.6                                 | CB  | T798 | 55.2   | CA  | L813 |
| 62.5                                 | CA  | P848 | 42.0   | CE  | K826 |
| 39.4                                 | CB  | I855 | 34.0   | CB  | K825 |
| 38.6                                 | CB  | L847 | 28.6   | CG1 | I783 |
| 71.5                                 | CB  | T806 | 56.4   | CA  | E844 |
| 68.4                                 | CB  | T815 | 57.5   | CA  | E812 |
| 51.1                                 | CD  | P795 | 23.6   | CB  | A786 |
| 52.7                                 | CA  | A845 | 46.4   | CA  | G808 |
| 69.6                                 | CB  | T798 | 28.3   | CB  | E839 |
| 38.0                                 | CB  | I794 | 35.3   | CB  | V835 |
| 58.4                                 | CA  | L807 | 52.9   | CA  | L847 |
| CHHC                                 |     |      |        |     |      |
| 20.7                                 | CB  | A845 | 14.4   | CD1 | I854 |
| 71.5                                 | CB  | T806 | 62.7   | CA  | V846 |
| 59.2                                 | CA  | T806 | 31.7   | CB  | V846 |
| 71.5                                 | CB  | T806 | 56.4   | CA  | E844 |
| 43.4                                 | CB  | F824 | 18.2   | CG2 | I854 |
| 63.5                                 | CA  | V784 | 54.2   | CA  | L799 |
| 54.9                                 | CA  | Y787 | 50.9   | CD  | P795 |
| 63.9                                 | CA  | V827 | 59.4   | CA  | V835 |
| 53.9                                 | CA  | Y788 | 50.9   | CD  | P795 |
| 45.2                                 | CA  | G856 | 27.4   | CG  | P848 |
| 45.8                                 | CB  | L799 | 63.6   | CA  | V784 |
| 54.1                                 | CA  | L799 | 21.8   | CG2 | V784 |
| 49.4                                 | CD  | P848 | 43.4   | CB  | F824 |
| 39.4                                 | CB  | I855 | 34.0   | CB  | K825 |
| 43.0                                 | CD  | R841 | 22.3   | CD2 | L807 |
| 39.2                                 | CB  | I854 | 42.4   | CB  | I783 |
| 35.9                                 | CA  | V836 | 51.0   | CB  | P795 |

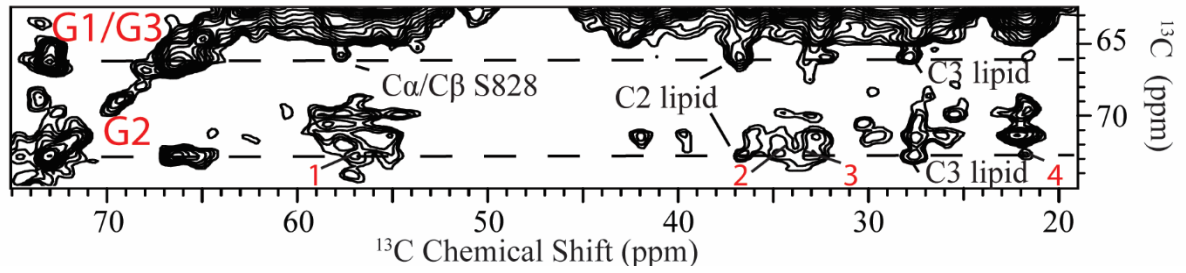

**Fig. S2** Section of 2D  $^{13}\text{C}$ - $^{13}\text{C}$  low-power PARIS spectrum with 1 s of mixing showing correlations between the glycerol backbone of the co-purifying lipid as well as intra-molecular lipid peaks. Possible assignments for the indicated peaks are given in **Table S2**.

**Table S2** List of potential protein assignments for peaks indicated in **Fig. S2**. Atoms which are close in space to the interface are indicated in yellow, those which are close in space to E852 are indicated in blue, and those which are close to helix  $\alpha 1$  are indicated in green

| 1  |       | 2  |      | 3  |      | 4   |      |
|----|-------|----|------|----|------|-----|------|
| CA | D843  | CB | V805 | CB | K811 | CG1 | V835 |
| CA | E851  | CB | V800 | CB | R821 | CG1 | V800 |
| CA | Y796  | CB | V840 | CB | E859 | CG2 | T806 |
| CA | S819  | CG | Q809 | CB | P793 | CG2 | V840 |
| CA | K 860 | CB | V858 |    |      | CG1 | V836 |
| CA | Y822  |    |      |    |      | CG2 | V784 |
| CA | E839  |    |      |    |      | CG2 | V827 |
| CA | R841  |    |      |    |      |     |      |
| CA | K857  |    |      |    |      |     |      |
| CA | E844  |    |      |    |      |     |      |

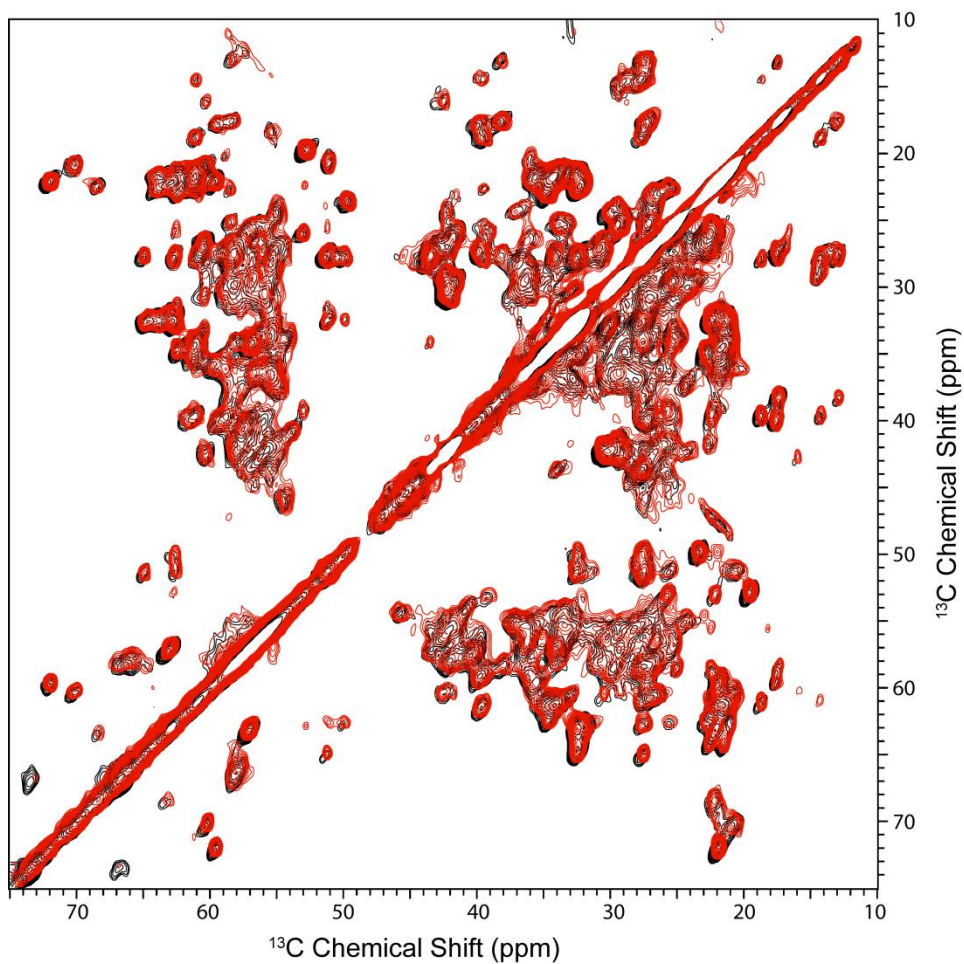

**Fig. S3** 2D  $^{13}\text{C}$ - $^{13}\text{C}$  PARIS (mixing time 30 ms) spectra of the Axin-DIX domain collected at the beginning (black) and end of 3D experiments (red). While the glycerol backbone peak is clearly reduced in the second spectrum, no other significant perturbations to the spectra are observed.

## References

- 1 J. Folch, M. Lees and G. H. Sloane Stanley, *J. Biol. Chem.*, 1957, **226**, 497–509.
- 2 A. Pines, M. G. Gibby and J. S. Waugh, *J Chem Phys*, 1973, **59**, 569–590.
- 3 S. Hartmann and E. Hahn, *Phys. Rev.*, 1962, **128**, 2042–2053.
- 4 M. Baldus, A. T. Petkova, J. Herzfeld and R. G. Griffin, *Mol Phys*, 1998, **95**, 1197–1207.
- 5 B. M. Fung, A. K. Khitrin and K. Ermolaev, *J Magn Reson*, 2000, **142**, 97–101.
- 6 M. Weingarth, P. Tekely, R. Brüschweiler and G. Bodenhausen, *Chem Commun*, 2010, **46**, 952–954.
- 7 M. Weingarth, G. Bodenhausen and P. Tekely, *J. Am. Chem. Soc.*, 2009, **131**, 13937–13939.
- 8 K. Seidel, A. Lange, S. Becker, C. E. Hughes, H. Heise and M. Baldus, *Phys. Chem. Chem. Phys.*, 2004, **6**, 5090–5093.
- 9 M. Baldus and B. H. Meier, *J. Magn. Reson. Ser. A*, 1996, **121**, 65–69.
- 10 C. R. Morcombe and K. W. Zilm, *J Magn Reson*, 2003, **162**, 479–486.
- 11 F. Delaglio, S. Grzesiek, G. W. Vuister, G. Zhu, J. Pfeifer and A. Bax, *J Biomol NMR*, 1995, **6**, 277–293.
- 12 R. Keller, *The Computer Aided Resonance Assignment Tutorial, 1st edit.*, Goldau, Switzerland, 2004.
- 13 S. Gradmann, C. Ader, I. Heinrich, D. Nand, M. Dittmann, A. Cukkemane, M. van Dijk, A. M. J. J. Bonvin, M. Engelhard and M. Baldus, *J. Biomol. NMR*, 2012, **54**, 377–387.
